# Supplementary material for: In Vitro Anticancer Activity of Mucoadhesive Oral Films Loaded with Usnea barbata (L.) F. H. Wigg Dry Acetone Extract, with Potential Applications in Oral Squamous Cell Carcinoma Complementary Therapy
Source: Antioxidants (Basel). 2022 Sep 28;11(10):1934. doi: 10.3390/antiox11101934 (PMC9598167; doi:10.3390/antiox11101934)
Supplement: Supplementary file 1 [file antioxidants-11-01934-s001.zip › Principal Component Analysis F-UBA.xlsx]

## Sheet: PCA F-UBA
	V bc	EA bc	LA bc	N bc	C3/7 bc	NC bc	A bc	ROS bc	G0/G1 bc	DNAs bc	subG0/G1 bc	V oscc	EA oscc	LA oscc	N oscc	C3/7 oscc	NC oscc	A oscc	ROS oscc	G0/G1 oscc	DNAs oscc	subG0/G1 oscc
C1DMSO	99.48	0	0	0.52	29.26	24.51	51.3	242	88.52	10.36	2.02	99.39	0	0	0.09	21.88	16.11	12.57	15.67	92.13	12.45	15.19
C2UA	61.44	37.05	1.27	0.25	44.74	3.19	27.05	846.67	90.05	6.49	0	54.05	12.92	18.85	14.17	27.02	44.03	53.35	966.67	90.05	3.15	1.9
F-UBA	94.52	0	0	5.47	22.54	4.94	5.23	543.33	85.87	0.6	2.11	98.77	0	0	1.1	1.79	33.32	50.08	510	93.32	8.55	4.49
				XLSTAT-Student 2022.2.1.1309 - Principal Component Analysis (PCA) - Start time: 21/07/2022 at 22:06:50 / End time: 21/07/2022 at 22:07:05 / Microsoft Excel 16.015330
				Observations/variables table: Workbook = statistica ok plasturi culturi sange si celule tumorale rezultate finale 18.07.2022.xlsx / Sheet = PCA F-UBA / Range = 'PCA F-UBA'!$B$1:$W$4 / 3 rows and 22 columns
				Observation labels: Workbook = statistica ok plasturi culturi sange si celule tumorale rezultate finale 18.07.2022.xlsx / Sheet = PCA F-UBA / Range = 'PCA F-UBA'!$A$1:$A$4 / 3 rows and 1 column
				PCA type: Correlation
				Standardisation: (n)
				Type of biplot: Correlation biplot / Coefficient = Automatic
				Summary statistics:
				Variable	Observations	Obs. with missing data	Obs. without missing data	Minimum	Maximum	Mean	Std. deviation
				V bc	3	0	3	61.44	99.48	85.1467	20.6798
				EA bc	3	0	3	0	37.05	12.35	21.3908
				LA bc	3	0	3	0	1.27	0.423333	0.733235
				N bc	3	0	3	0.25	5.47	2.08	2.93893
				C3/7 bc	3	0	3	22.54	44.74	32.18	11.3844
				NC bc	3	0	3	3.19	24.51	10.88	11.8363
				A bc	3	0	3	5.23	51.3	27.86	23.0457
				ROS bc	3	0	3	242	846.67	544	302.336
				G0/G1 bc	3	0	3	85.87	90.05	88.1467	2.11486
				DNAs bc	3	0	3	0.6	10.36	5.81667	4.91472
				subG0/G1 bc	3	0	3	0	2.11	1.37667	1.19308
				V oscc	3	0	3	54.05	99.39	84.07	25.9999
				EA oscc	3	0	3	0	12.92	4.30667	7.45937
				LA oscc	3	0	3	0	18.85	6.28333	10.8831
				N oscc	3	0	3	0.09	14.17	5.12	7.85378
				C3/7 oscc	3	0	3	1.79	27.02	16.8967	13.3328
				NC oscc	3	0	3	16.11	44.03	31.1533	14.0855
				A oscc	3	0	3	12.57	53.35	38.6667	22.6594
				ROS oscc	3	0	3	15.67	966.67	497.447	475.624
				G0/G1 oscc	3	0	3	90.05	93.32	91.8333	1.65506
				DNAs oscc	3	0	3	3.15	12.45	8.05	4.67012
				subG0/G1 oscc	3	0	3	1.9	15.19	7.19333	7.04536
				Correlation matrix (Pearson (n)):
				Variables	V bc	EA bc	LA bc	N bc	C3/7 bc	NC bc	A bc	ROS bc	G0/G1 bc	DNAs bc	subG0/G1 bc	V oscc	EA oscc	LA oscc	N oscc	C3/7 oscc	NC oscc	A oscc	ROS oscc	G0/G1 oscc	DNAs oscc	subG0/G1 oscc
				V bc	1	-0.992783	-0.992783	0.434368	-0.913164	0.657732	0.150087	-0.920489	-0.698647	0.00128433	0.987553	0.994142	-0.992783	-0.992783	-0.99844	-0.56246	-0.859249	-0.656395	-0.910525	0.883297	0.952171	0.737034	V bc
				EA bc	-0.992783	1	1	-0.539253	0.955454	-0.562653	-0.0304387	0.866983	0.779406	0.118649	-0.999288	-0.999929	1	1	0.997931	0.657556	0.7917	0.561185	0.85437	-0.933144	-0.908655	-0.650664	EA bc
				LA bc	-0.992783	1	1	-0.539253	0.955454	-0.562653	-0.0304387	0.866983	0.779406	0.118649	-0.999288	-0.999929	1	1	0.997931	0.657556	0.7917	0.561185	0.85437	-0.933144	-0.908655	-0.650664	LA bc
				N bc	0.434368	-0.539253	-0.539253	1	-0.763782	-0.392782	-0.825339	-0.0478522	-0.947916	-0.900177	0.570633	0.529174	-0.539253	-0.539253	-0.483987	-0.989065	0.0875475	0.394413	-0.0230899	0.805954	0.138359	-0.288622	N bc
				C3/7 bc	-0.913164	0.955454	0.955454	-0.763782	1	-0.293598	0.265921	0.681283	0.929598	0.406419	-0.965906	-0.951867	0.955454	0.955454	0.934499	0.850625	0.576128	0.291902	0.662938	-0.99768	-0.744942	-0.39756	C3/7 bc
				NC bc	0.657732	-0.562653	-0.562653	-0.392782	-0.293598	1	0.843437	-0.899783	0.0794039	0.754096	0.531072	0.57247	-0.562653	-0.562653	-0.614645	0.252859	-0.950488	-0.999998	-0.910317	0.227837	0.856442	0.99386	NC bc
				A bc	0.150087	-0.0304387	-0.0304387	-0.825339	0.265921	0.843437	1	-0.524496	0.602505	0.988865	-0.00728307	0.0423541	-0.0304387	-0.0304387	-0.0946461	0.733041	-0.634725	-0.844389	-0.54543	-0.330933	0.445013	0.778819	A bc
				ROS bc	-0.920489	0.866983	0.866983	-0.0478522	0.681283	-0.899783	-0.524496	1	0.363515	-0.391951	-0.84757	-0.872863	0.866983	0.866983	0.897232	0.194641	0.99083	0.899007	0.999693	-0.629867	-0.995868	-0.942535	ROS bc
				G0/G1 bc	-0.698647	0.779406	0.779406	-0.947916	0.929598	0.0794039	0.602505	0.363515	1	0.714569	-0.802482	-0.771881	0.779406	0.779406	0.737508	0.984526	0.234309	-0.0811726	0.340322	-0.952534	-0.446609	-0.0313748	G0/G1 bc
				DNAs bc	0.00128433	0.118649	0.118649	-0.900177	0.406419	0.754096	0.988865	-0.391951	0.714569	1	-0.156015	-0.106801	0.118649	0.118649	0.054557	0.826102	-0.512661	-0.75526	-0.414624	-0.46768	0.306788	0.676801	DNAs bc
				subG0/G1 bc	0.987553	-0.999288	-0.999288	0.570633	-0.965906	0.531072	-0.00728307	-0.84757	-0.802482	-0.156015	1	0.998768	-0.999288	-0.999288	-0.994795	-0.685505	-0.768094	-0.529567	-0.834162	0.94604	0.892259	0.62156	subG0/G1 bc
				V oscc	0.994142	-0.999929	-0.999929	0.529174	-0.951867	0.57247	0.0423541	-0.872863	-0.771881	-0.106801	0.998768	1	-0.999929	-0.999929	-0.998626	-0.648527	-0.798928	-0.571014	-0.860506	0.928791	0.913569	0.659672	V oscc
				EA oscc	-0.992783	1	1	-0.539253	0.955454	-0.562653	-0.0304387	0.866983	0.779406	0.118649	-0.999288	-0.999929	1	1	0.997931	0.657556	0.7917	0.561185	0.85437	-0.933144	-0.908655	-0.650664	EA oscc
				LA oscc	-0.992783	1	1	-0.539253	0.955454	-0.562653	-0.0304387	0.866983	0.779406	0.118649	-0.999288	-0.999929	1	1	0.997931	0.657556	0.7917	0.561185	0.85437	-0.933144	-0.908655	-0.650664	LA oscc
				N oscc	-0.99844	0.997931	0.997931	-0.483987	0.934499	-0.614645	-0.0946461	0.897232	0.737508	0.054557	-0.994795	-0.998626	0.997931	0.997931	1	0.607751	0.829343	0.613244	0.886017	-0.908097	-0.933623	-0.698145	N oscc
				C3/7 oscc	-0.56246	0.657556	0.657556	-0.989065	0.850625	0.252859	0.733041	0.194641	0.984526	0.826102	-0.685505	-0.648527	0.657556	0.657556	0.607751	1	0.0603242	-0.254576	0.170279	-0.884446	-0.282908	0.144262	C3/7 oscc
				NC oscc	-0.859249	0.7917	0.7917	0.0875475	0.576128	-0.950488	-0.634725	0.99083	0.234309	-0.512661	-0.768094	-0.798928	0.7917	0.7917	0.829343	0.0603242	1	0.949935	0.993873	-0.519146	-0.974466	-0.979035	NC oscc
				A oscc	-0.656395	0.561185	0.561185	0.394413	0.291902	-0.999998	-0.844389	0.899007	-0.0811726	-0.75526	-0.529567	-0.571014	0.561185	0.561185	0.613244	-0.254576	0.949935	1	0.909581	-0.226109	-0.855524	-0.993663	A oscc
				ROS oscc	-0.910525	0.85437	0.85437	-0.0230899	0.662938	-0.910317	-0.54543	0.999693	0.340322	-0.414624	-0.834162	-0.860506	0.85437	0.85437	0.886017	0.170279	0.993873	0.909581	1	-0.61043	-0.993313	-0.950524	ROS oscc
				G0/G1 oscc	0.883297	-0.933144	-0.933144	0.805954	-0.99768	0.227837	-0.330933	-0.629867	-0.952534	-0.46768	0.94604	0.928791	-0.933144	-0.933144	-0.908097	-0.884446	-0.519146	-0.226109	-0.61043	1	0.697796	0.334169	G0/G1 oscc
				DNAs oscc	0.952171	-0.908655	-0.908655	0.138359	-0.744942	0.856442	0.445013	-0.995868	-0.446609	0.306788	0.892259	0.913569	-0.908655	-0.908655	-0.933623	-0.282908	-0.974466	-0.855524	-0.993313	0.697796	1	0.908301	DNAs oscc
				subG0/G1 oscc	0.737034	-0.650664	-0.650664	-0.288622	-0.39756	0.99386	0.778819	-0.942535	-0.0313748	0.676801	0.62156	0.659672	-0.650664	-0.650664	-0.698145	0.144262	-0.979035	-0.993663	-0.950524	0.334169	0.908301	1	subG0/G1 oscc
				Values in bold are different from 0 with a significance level alpha=0,05
				Variables	V bc	EA bc	LA bc	N bc	C3/7 bc	NC bc	A bc	ROS bc	G0/G1 bc	DNAs bc	subG0/G1 bc	V oscc	EA oscc	LA oscc	N oscc	C3/7 oscc	NC oscc	A oscc	ROS oscc	G0/G1 oscc	DNAs oscc	subG0/G1 oscc
				Principal Component Analysis:
				Eigenvalues:
					F1	F2
				Eigenvalue	15.264	6.73603
				Variability (%)	69.3817	30.6183
				Cumulative %	69.3817	100
				Eigenvectors:
					F1	F2
				V bc	-0.255907	-0.00758629
				EA bc	0.253456	0.0537291
				LA bc	0.253456	0.0537291
				N bc	-0.106619	-0.350281
				C3/7 bc	0.231631	0.163942
				NC bc	-0.172114	0.285181
				A bc	-0.0433909	0.379722
				ROS bc	0.237529	-0.143551
				G0/G1 bc	0.175183	0.280915
				DNAs bc	-0.00536828	0.385214
				subG0/G1 bc	-0.251929	-0.0680814
				V oscc	-0.253863	-0.0491762
				EA oscc	0.253456	0.0537291
				LA oscc	0.253456	0.0537291
				N oscc	0.255226	0.0290851
				C3/7 oscc	0.13977	0.32278
				NC oscc	0.222466	-0.190546
				A oscc	0.171778	-0.285641
				ROS oscc	0.235093	-0.152365
				G0/G1 oscc	-0.223679	-0.1873
				DNAs oscc	-0.245207	0.110488
				subG0/G1 oscc	-0.192018	0.254765
				Factor loadings:
					F1	F2
				V bc	-0.999806	-0.0196893
				EA bc	0.990229	0.139448
				LA bc	0.990229	0.139448
				N bc	-0.416549	-0.909113
				C3/7 bc	0.904962	0.425493
				NC bc	-0.672436	0.740155
				A bc	-0.169524	0.985526
				ROS bc	0.928004	-0.372569
				G0/G1 bc	0.684424	0.729084
				DNAs bc	-0.0209734	0.99978
				subG0/G1 bc	-0.984265	-0.176698
				V oscc	-0.991822	-0.127631
				EA oscc	0.990229	0.139448
				LA oscc	0.990229	0.139448
				N oscc	0.997147	0.0754871
				C3/7 oscc	0.546071	0.837739
				NC oscc	0.869155	-0.494541
				A oscc	0.671121	-0.741347
				ROS oscc	0.918489	-0.395447
				G0/G1 oscc	-0.873895	-0.486115
				DNAs oscc	-0.958003	0.286759
				subG0/G1 oscc	-0.750199	0.661212
				Correlations between variables and factors:
					F1	F2
				V bc	-0.999806	-0.0196893
				EA bc	0.990229	0.139448
				LA bc	0.990229	0.139448
				N bc	-0.416549	-0.909113
				C3/7 bc	0.904962	0.425493
				NC bc	-0.672436	0.740155
				A bc	-0.169524	0.985526
				ROS bc	0.928004	-0.372569
				G0/G1 bc	0.684424	0.729084
				DNAs bc	-0.0209734	0.99978
				subG0/G1 bc	-0.984265	-0.176698
				V oscc	-0.991822	-0.127631
				EA oscc	0.990229	0.139448
				LA oscc	0.990229	0.139448
				N oscc	0.997147	0.0754871
				C3/7 oscc	0.546071	0.837739
				NC oscc	0.869155	-0.494541
				A oscc	0.671121	-0.741347
				ROS oscc	0.918489	-0.395447
				G0/G1 oscc	-0.873895	-0.486115
				DNAs oscc	-0.958003	0.286759
				subG0/G1 oscc	-0.750199	0.661212
				Contribution of the variables (%):
					F1	F2
				V bc	6.54883	0.00575518
				EA bc	6.42398	0.288681
				LA bc	6.42398	0.288681
				N bc	1.13675	12.2696
				C3/7 bc	5.36529	2.6877
				NC bc	2.96233	8.13284
				A bc	0.188277	14.4189
				ROS bc	5.64199	2.06068
				G0/G1 bc	3.0689	7.89135
				DNAs bc	0.00288184	14.839
				subG0/G1 bc	6.34683	0.463508
				V oscc	6.44465	0.24183
				EA oscc	6.42398	0.288681
				LA oscc	6.42398	0.288681
				N oscc	6.51404	0.0845945
				C3/7 oscc	1.95358	10.4187
				NC oscc	4.9491	3.63078
				A oscc	2.95077	8.15905
				ROS oscc	5.52688	2.32152
				G0/G1 oscc	5.00323	3.50812
				DNAs oscc	6.01265	1.22076
				subG0/G1 oscc	3.6871	6.4905
				Squared cosines of the variables:
					F1	F2
				V bc	0.999612	0.00038767
				EA bc	0.980554	0.0194457
				LA bc	0.980554	0.0194457
				N bc	0.173513	0.826487
				C3/7 bc	0.818956	0.181044
				NC bc	0.45217	0.54783
				A bc	0.0287385	0.971261
				ROS bc	0.861192	0.138808
				G0/G1 bc	0.468437	0.531563
				DNAs bc	0.000439884	0.99956
				subG0/G1 bc	0.968778	0.031222
				V oscc	0.98371	0.0162897
				EA oscc	0.980554	0.0194457
				LA oscc	0.980554	0.0194457
				N oscc	0.994302	0.00569831
				C3/7 oscc	0.298194	0.701806
				NC oscc	0.75543	0.24457
				A oscc	0.450404	0.549596
				ROS oscc	0.843622	0.156378
				G0/G1 oscc	0.763692	0.236308
				DNAs oscc	0.917769	0.0822307
				subG0/G1 oscc	0.562798	0.437202
				Values in bold correspond for each variable to the factor for which the squared cosine is the largest
				Factor scores:
					F1	F2
				C1DMSO	-3.40287	2.89171
				C2UA	5.47123	0.511833
				F-UBA	-2.06836	-3.40354
				Contribution of the observations (%):
					F1	F2
				C1DMSO	25.2872	41.3795
				C2UA	65.3703	1.29638
				F-UBA	9.3425	57.3242
				Squared cosines of the observations:
					F1	F2
				C1DMSO	0.580674	0.419326
				C2UA	0.991324	0.00867566
				F-UBA	0.269704	0.730296
				Values in bold correspond for each observation to the factor for which the squared cosine is the largest
