# Supplementary figures and images for: In Vitro Anticancer Activity of Mucoadhesive Oral Films Loaded with Usnea barbata (L.) F. H. Wigg Dry Acetone Extract, with Potential Applications in Oral Squamous Cell Carcinoma Complementary Therapy
Source: MDPI journal article supplement (doi:10.3390/antiox11101934), 2022-09-28

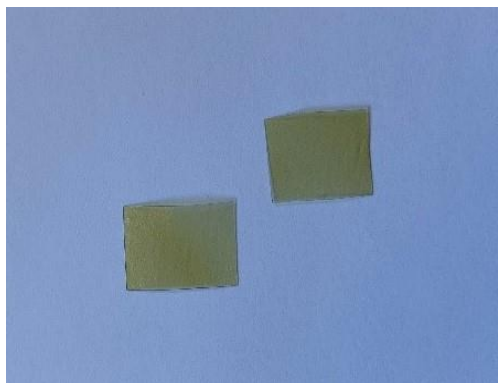

**(a)**

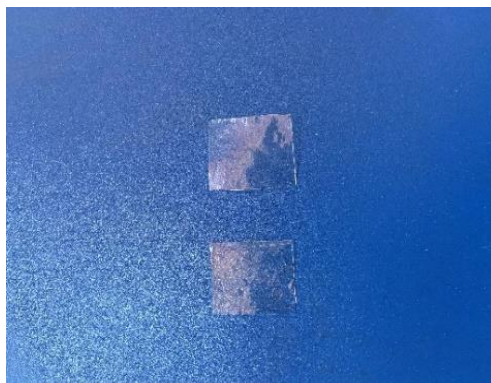

**(b)**

**Figure S1.** Bioadhesive films: (a) Loaded with UBA (F-UBA); (b) References (R).

Supplement: s1 [file s1]
